# Supplementary material for: A complex of the ubiquitin ligase TRIM32 and the deubiquitinase USP7 balances the level of c-Myc ubiquitination and thereby determines neural stem cell fate specification
Source: PubMed Central journal article supplement (PMC6460386; doi:10.1038/s41418-018-0144-1), 2018-06-13

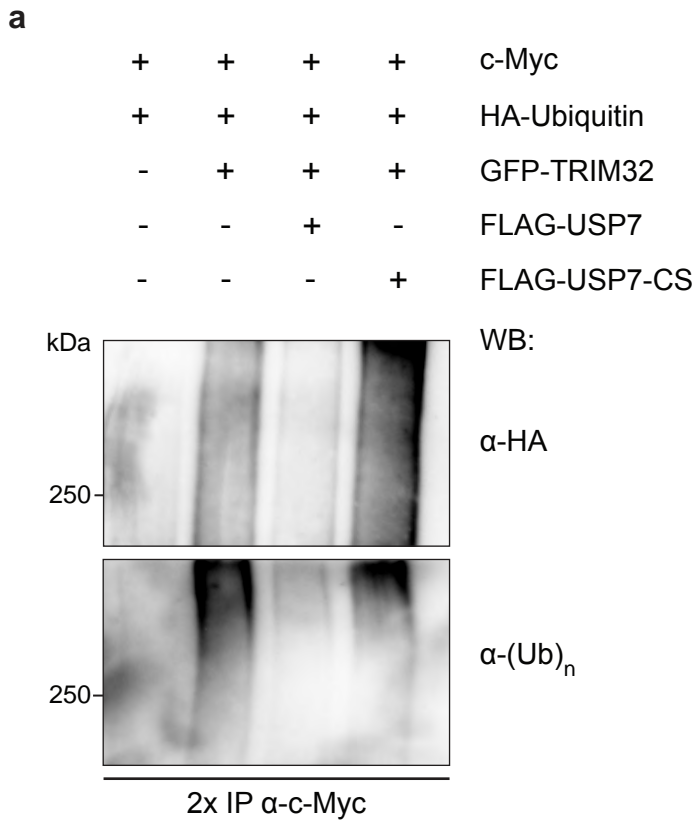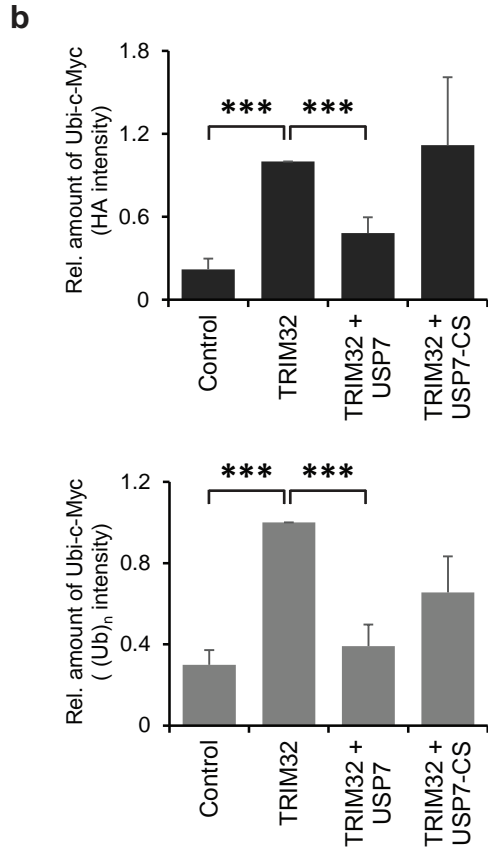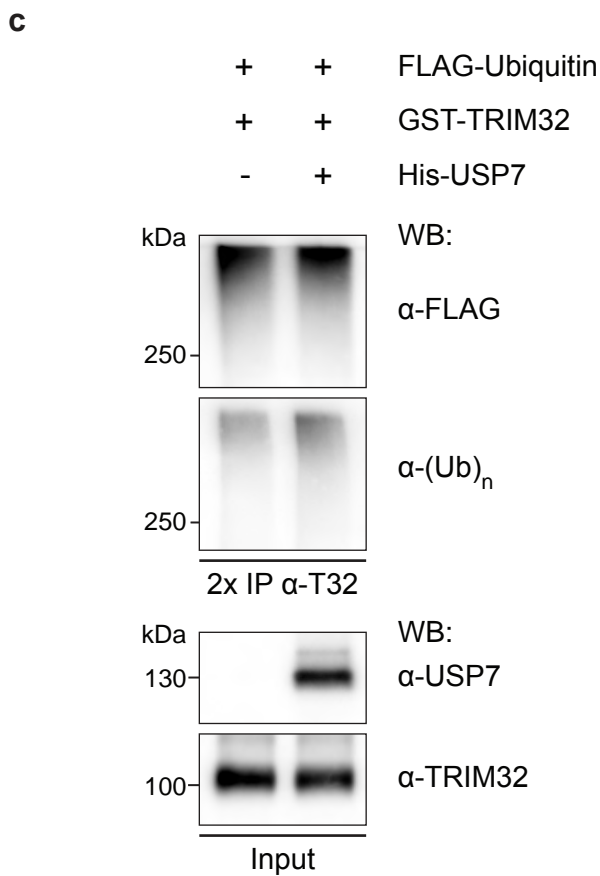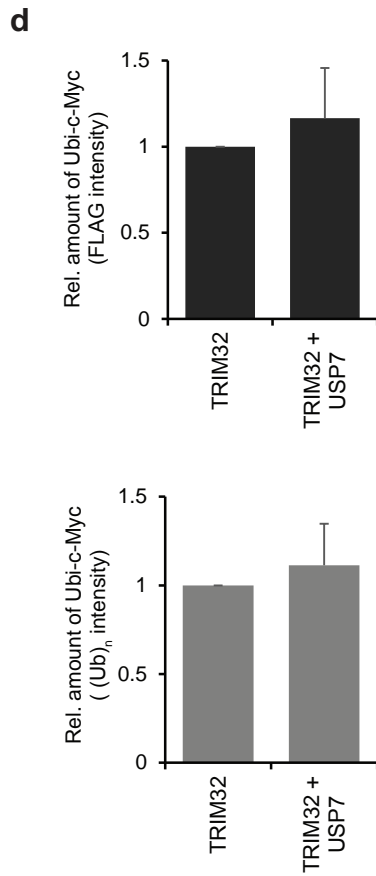

Supplement: 41418_2018_144_MOESM4_ESM.pdf [file 41418_2018_144_MOESM4_ESM.pdf]
